# Supplementary material
Source: MDPI journal article supplement (https://www.mdpi.com/2077-1312/10/12/1940)
Supplement: s1 [file s1]

Table S1. Environmental parameters in summer and winter (mean with SD).

|                                        | Summer      |             |             |             |             |             |             |             |             |             |             |             |             |             |             |
|----------------------------------------|-------------|-------------|-------------|-------------|-------------|-------------|-------------|-------------|-------------|-------------|-------------|-------------|-------------|-------------|-------------|
|                                        | S1          | S2          | S3          | S4          | S5          | S6          | S7          | S8          | S9          | S10         | S11         | S12         | S13         | S14         | S15         |
| Temperature (°C)                       | 29.77±0.17  | 29.69±0.19  | 29.65±0.05  | 29.67±0.18  | 29.56±0.10  | 29.3±0.01   | 29.28±0.19  | 29.28±0.10  | 29.37±0.11  | 29.22±0.13  | 29.38±0.15  | 29.46±0.10  | 29.16±0.14  | 29.43±0.02  | 29.66±0.11  |
| Salinity (ppt)                         | 17.35±0.06  | 17.72±0.20  | 18.83±0.07  | 18.76±0.10  | 19.1±0.05   | 24.21±0.09  | 24.79±0.08  | 26±0.08     | 26.95±0.01  | 28.5±0.10   | 29.36±0.08  | 29.68±0.14  | 30.89±0.07  | 30.16±0.20  | 29.87±0.06  |
| pH                                     | 7.74±0.14   | 7.73±0.09   | 7.76±0.07   | 7.73±0.09   | 7.88±0.20   | 7.89±0.13   | 7.92±0.19   | 8.16±0.20   | 8.14±0.14   | 8.11±0.15   | 8.13±0.14   | 7.95±0.06   | 8.24±0.18   | 8.11±0.20   | 8.17±0.14   |
| DO (mg/L)                              | 5.2±0.02    | 5.5±0.03    | 5.4±0.01    | 5.4±0.09    | 5.6±0.14    | 5.8±0.04    | 5.8±0.09    | 6.5±0.19    | 6.4±0.07    | 6.2±0.03    | 6.1±0.10    | 6.7±0.13    | 6.4±0.10    | 6.3±0.05    | 6.3±0.06    |
| NO <sub>3</sub> <sup>-</sup> -N (mg/L) | 0.598±0.016 | 0.617±0.010 | 0.672±0.172 | 0.48±0.015  | 0.504±0.019 | 0.336±0.007 | 0.342±0.011 | 0.324±0.015 | 0.296±0.013 | 0.312±0.014 | 0.262±0.006 | 0.126±0.009 | 0.107±0.017 | 0.106±0.012 | 0.123±0.016 |
| NO <sub>2</sub> <sup>-</sup> -N (mg/L) | 0.204±0.001 | 0.08±0.002  | 0.182±0.001 | 0.162±0.003 | 0.12±0.003  | 0.104±0.001 | 0.093±0.001 | 0.014±0.002 | 0.012±0.002 | 0.023±0.001 | 0.013±0.003 | 0.009±0.003 | 0.016±0.001 | 0.019±0.002 | 0.008±0.002 |
| NH <sub>4</sub> <sup>+</sup> -N (mg/L) | 0.073±0.001 | 0.067±0.001 | 0.099±0.002 | 0.06±0.001  | 0.057±0.002 | 0.06±0.003  | 0.068±0.002 | 0.069±0.001 | 0.067±0.001 | 0.07±0.003  | 0.068±0.001 | 0.046±0.002 | 0.049±0.003 | 0.043±0.003 | 0.044±0.001 |
| DIN (mg/L)                             | 0.875±0.193 | 0.764±0.170 | 0.953±0.102 | 0.702±0.146 | 0.681±0.205 | 0.5±0.155   | 0.503±0.026 | 0.407±0.187 | 0.375±0.167 | 0.405±0.048 | 0.343±0.105 | 0.181±0.146 | 0.172±0.023 | 0.168±0.015 | 0.175±0.077 |
| DIP (mg/L)                             | 0.028±0.067 | 0.025±0.081 | 0.021±0.040 | 0.033±0.041 | 0.028±0.164 | 0.038±0.019 | 0.031±0.202 | 0.034±0.141 | 0.028±0.093 | 0.027±0.125 | 0.027±0.043 | 0.027±0.111 | 0.026±0.117 | 0.024±0.076 | 0.017±0.126 |
| Chl- <i>a</i> (µg/L)                   | 3.6±0.01    | 3.6±0.17    | 4.4±0.19    | 5.8±0.14    | 3.3±0.08    | 5.1±0.07    | 5.1±0.02    | 4.5±0.06    | 5.2±0.03    | 3.7±0.07    | 2.4±0.10    | 3.7±0.07    | 4.9±0.05    | 2.9±0.15    | 2.9±0.10    |
| TOC (mg/L)                             | 4.27±0.06   | 4.03±0.02   | 3.78±0.13   | 2.92±0.18   | 2.49±0.15   | 2.71±0.05   | 2.47±0.20   | 2.33±0.14   | 2.54±0.05   | 2.16±0.03   | 2.4±0.06    | 2.31±0.16   | 1.89±0.04   | 2.21±0.07   | 2.22±0.06   |
| COD (mg/L)                             | 2.48±0.04   | 2.65±0.06   | 2.48±0.14   | 2.26±0.20   | 2.47±0.05   | 2.57±0.13   | 2.27±0.03   | 2±0.12      | 2.16±0.01   | 2.13±0.03   | 1.82±0.15   | 1.56±0.16   | 1.65±0.18   | 1.18±0.19   | 1.29±0.17   |
| TN (mg/L)                              | 1.148±0.104 | 0.935±0.167 | 1.056±0.080 | 0.822±0.100 | 0.812±0.033 | 0.663±0.043 | 0.706±0.173 | 0.631±0.088 | 0.532±0.021 | 0.501±0.103 | 0.562±0.171 | 0.35±0.192  | 0.331±0.204 | 0.256±0.127 | 0.269±0.136 |
| TP (mg/L)                              | 0.054±0.071 | 0.047±0.041 | 0.04±0.017  | 0.082±0.018 | 0.064±0.093 | 0.082±0.186 | 0.068±0.064 | 0.082±0.010 | 0.07±0.091  | 0.049±0.133 | 0.066±0.104 | 0.058±0.155 | 0.055±0.105 | 0.046±0.191 | 0.031±0.072 |
| EI                                     | 13.5±0.07   | 11.25±0.12  | 11.03±0.01  | 11.63±0.06  | 10.47±0.13  | 10.85±0.13  | 7.87±0.20   | 6.15±0.16   | 5.04±0.14   | 5.18±0.09   | 3.75±0.11   | 1.69±0.17   | 1.64±0.12   | 1.06±0.06   | 0.85±0.18   |

|                                        | Winter      |             |             |             |             |             |             |             |             |             |             |             |             |             |             |
|----------------------------------------|-------------|-------------|-------------|-------------|-------------|-------------|-------------|-------------|-------------|-------------|-------------|-------------|-------------|-------------|-------------|
|                                        | S1          | S2          | S3          | S4          | S5          | S6          | S7          | S8          | S9          | S10         | S11         | S12         | S13         | S14         | S15         |
| Temperature (°C)                       | 18.6±0.03   | 18.5±0.06   | 18.6±0.15   | 18.6±0.17   | 18.7±0.13   | 18.6±0.05   | 18.8±0.09   | 19.6±0.17   | 20.5±0.09   | 19.4±0.16   | 19.7±0.04   | 19±0.01     | 19.7±0.05   | 18.9±0.10   | 18.8±0.05   |
| Salinity (ppt)                         | 24.4±0.08   | 23.9±0.10   | 25.3±0.16   | 25.4±0.15   | 26±0.14     | 26.7±0.20   | 27.9±0.19   | 28.7±0.05   | 27.8±0.13   | 29.5±0.15   | 29.9±0.16   | 29.5±0.13   | 30.1±0.07   | 29.6±0.08   | 30.4±0.15   |
| pH                                     | 7.99±0.08   | 7.99±0.11   | 8.04±0.19   | 7.83±0.06   | 8.1±0.04    | 8.15±0.10   | 8.2±0.12    | 8.41±0.19   | 8.36±0.12   | 8.4±0.20    | 8.37±0.03   | 8.16±0.14   | 8.74±0.08   | 8.27±0.11   | 8.27±0.03   |
| DO (mg/L)                              | 6.2±0.19    | 6.2±0.10    | 6.2±0.05    | 6.1±0.20    | 6.3±0.04    | 6.1±0.17    | 7.1±0.18    | 6.2±0.16    | 7.2±0.05    | 7.2±0.18    | 7.1±0.02    | 7.2±0.01    | 7.2±0.19    | 6.8±0.03    | 6.4±0.05    |
| NO <sub>3</sub> <sup>-</sup> -N (mg/L) | 0.559±0.010 | 0.473±0.009 | 0.391±0.018 | 0.374±0.004 | 0.342±0.011 | 0.289±0.009 | 0.328±0.014 | 0.373±0.012 | 0.366±0.007 | 0.294±0.010 | 0.315±0.006 | 0.287±0.017 | 0.184±0.014 | 0.184±0.006 | 0.208±0.009 |
| NO <sub>2</sub> <sup>-</sup> -N (mg/L) | 0.013±0.003 | 0.007±0.001 | 0.009±0.002 | 0.009±0.002 | 0.009±0.001 | 0.008±0.002 | 0.008±0.001 | 0.006±0.001 | 0.007±0.003 | 0.006±0.001 | 0.005±0.001 | 0.005±0.002 | 0.006±0.003 | 0.007±0.001 | 0.008±0.002 |
| NH <sub>4</sub> <sup>+</sup> -N (mg/L) | 0.15±0.002  | 0.117±0.002 | 0.111±0.001 | 0.109±0.003 | 0.095±0.001 | 0.086±0.002 | 0.074±0.003 | 0.092±0.003 | 0.08±0.001  | 0.108±0.002 | 0.082±0.001 | 0.088±0.003 | 0.178±0.001 | 0.152±0.001 | 0.178±0.002 |
| DIN (mg/L)                             | 0.722±0.185 | 0.597±0.071 | 0.511±0.182 | 0.492±0.094 | 0.446±0.102 | 0.383±0.115 | 0.41±0.045  | 0.471±0.132 | 0.453±0.058 | 0.408±0.073 | 0.402±0.021 | 0.38±0.169  | 0.368±0.144 | 0.343±0.172 | 0.394±0.055 |
| DIP (mg/L)                             | 0.012±0.133 | 0.014±0.066 | 0.016±0.148 | 0.016±0.095 | 0.018±0.127 | 0.016±0.155 | 0.013±0.182 | 0.012±0.056 | 0.012±0.100 | 0.014±0.183 | 0.015±0.184 | 0.015±0.010 | 0.02±0.066  | 0.016±0.143 | 0.016±0.170 |
| Chl- <i>a</i> (µg/L)                   | 7.2±0.20    | 7.1±0.03    | 7.2±0.13    | 7.1±0.02    | 5.3±0.05    | 5±0.04      | 4.9±0.08    | 4.9±0.08    | 4.7±0.04    | 3.8±0.19    | 3.2±0.05    | 3.4±0.13    | 4.8±0.17    | 3.6±0.14    | 4.0±0.13    |
| TOC (mg/L)                             | 3.12±0.11   | 3.05±0.16   | 3.1±0.14    | 3.1±0.01    | 2.86±0.03   | 2.77±0.08   | 2.4±0.15    | 2.44±0.17   | 2.1±0.16    | 2.3±0.09    | 2.1±0.02    | 2.13±0.19   | 2.06±0.14   | 2.04±0.20   | 2.11±0.10   |
| COD (mg/L)                             | 2.02±0.07   | 2.05±0.19   | 2.01±0.12   | 1.91±0.14   | 1.93±0.15   | 1.62±0.08   | 1.66±0.19   | 1.65±0.05   | 1.49±0.20   | 1.3±0.02    | 1.18±0.08   | 0.97±0.03   | 0.82±0.03   | 0.93±0.02   | 0.85±0.05   |
| TN (mg/L)                              | 1.159±0.198 | 0.895±0.049 | 0.792±0.083 | 0.871±0.083 | 0.662±0.043 | 0.663±0.144 | 0.642±0.192 | 0.546±0.042 | 0.552±0.033 | 0.517±0.091 | 0.535±0.086 | 0.493±0.106 | 0.552±0.174 | 0.486±0.105 | 0.573±0.124 |
| TP (mg/L)                              | 0.029±0.029 | 0.025±0.088 | 0.029±0.140 | 0.035±0.025 | 0.039±0.058 | 0.038±0.124 | 0.03±0.117  | 0.022±0.098 | 0.027±0.044 | 0.034±0.143 | 0.03±0.076  | 0.029±0.157 | 0.039±0.063 | 0.035±0.054 | 0.034±0.186 |
| EI                                     | 3.89±0.10   | 3.81±0.15   | 3.65±0.18   | 3.34±0.13   | 3.44±0.20   | 2.21±0.02   | 1.97±0.07   | 2.07±0.17   | 1.8±0.18    | 1.65±0.10   | 1.58±0.04   | 1.23±0.20   | 1.34±0.03   | 1.13±0.17   | 1.19±0.17   |

DO: Dissolved Oxygen

**DIN: Dissolved Inorganic Nitrogen**

**DIP: Dissolved Inorganic Phosphorus**

**Chl-*a*: Chlorophyll-*a***

**TOC: Total Organic Carbon**

**COD: Chemical Oxygen Demand**

**TN: Total Nitrogen**

**TP: Total Phosphorus**

**EI: Eutrophication Index**
